# Supplementary material for: Optimized electron/ion transport by constructing radially oriented channels in MXene hybrid fiber electrodes for high-performance supercapacitors at low temperatures
Source: Royal Society of Chemistry journal article supplement (doi:10.1039/d2ta08662j), 2022-12-19
Supplement: d2ta08662j1.pdf [file d2ta08662j1.pdf]

Electronic Supplementary Material (ESI) for Journal of Materials Chemistry A. This journal is © The Royal Society of Chemistry 20XX

## **Optimized electron/ion transport by constructing radially oriented channels in MXene hybrid fiber electrodes for high-performance supercapacitors at low temperatures**

Tianyu Zhao,<sup>a,b</sup> Dongzhi Yang,<sup>a,\*</sup> Shu-Meng Hao,<sup>a</sup> Ting Xu,<sup>b</sup> Ming Zhang,<sup>b</sup> Weidong Zhou<sup>a</sup> and Zhong-Zhen Yu<sup>a,b\*</sup>

<sup>a</sup> State Key Laboratory of Organic-Inorganic Composites, College of Materials Science and Engineering, Beijing University of Chemical Technology, Beijing 100029, China.

E-mail: yangdz@mail.buct.edu.cn

<sup>b</sup> Beijing Key Laboratory of Advanced Functional Polymer Composites, Beijing University of Chemical Technology, Beijing, 100029, China.

E-mail: yuzz@mail.buct.edu.cn

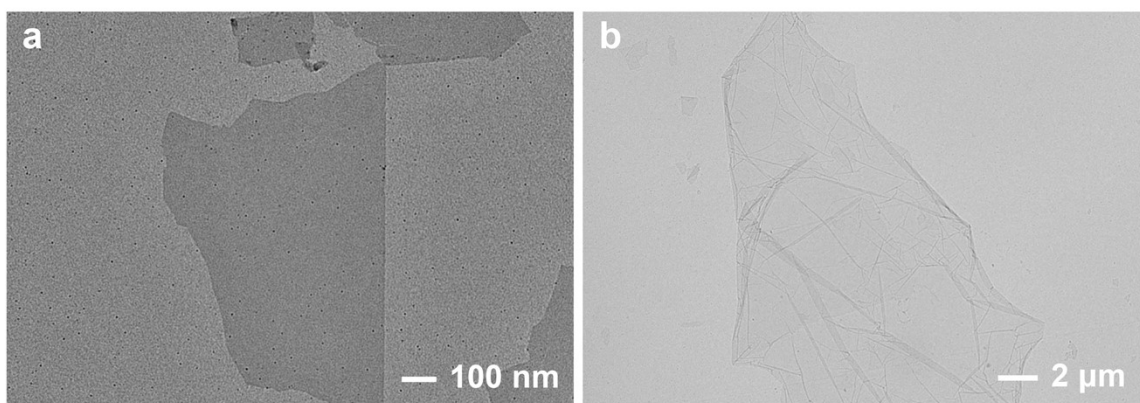

**Fig. S1.** TEM images of (a)  $\text{Ti}_3\text{C}_2\text{T}_x$  nanosheets and (b) GO nanosheets.

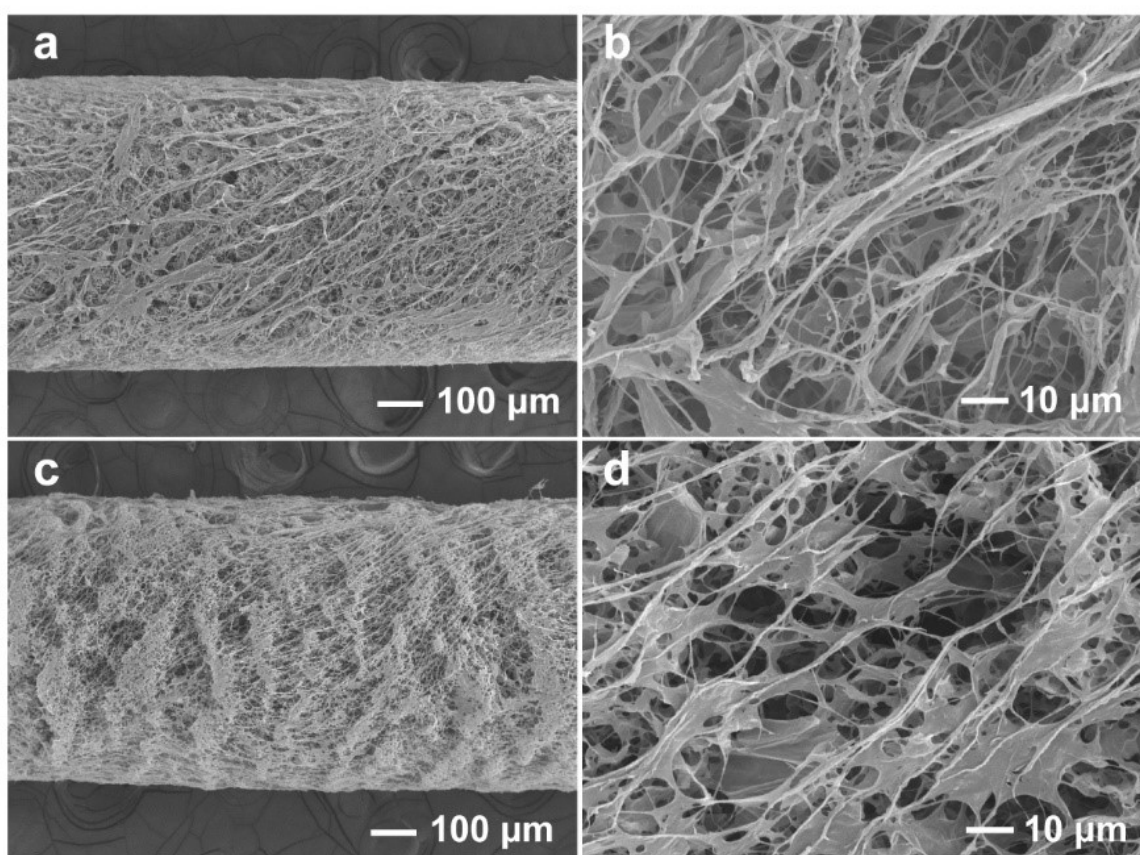

**Fig. S2.** SEM images of the surface structures of (a, b) U-MGP<sub>3</sub> and (c, d) D-MGP<sub>3</sub> fibers.

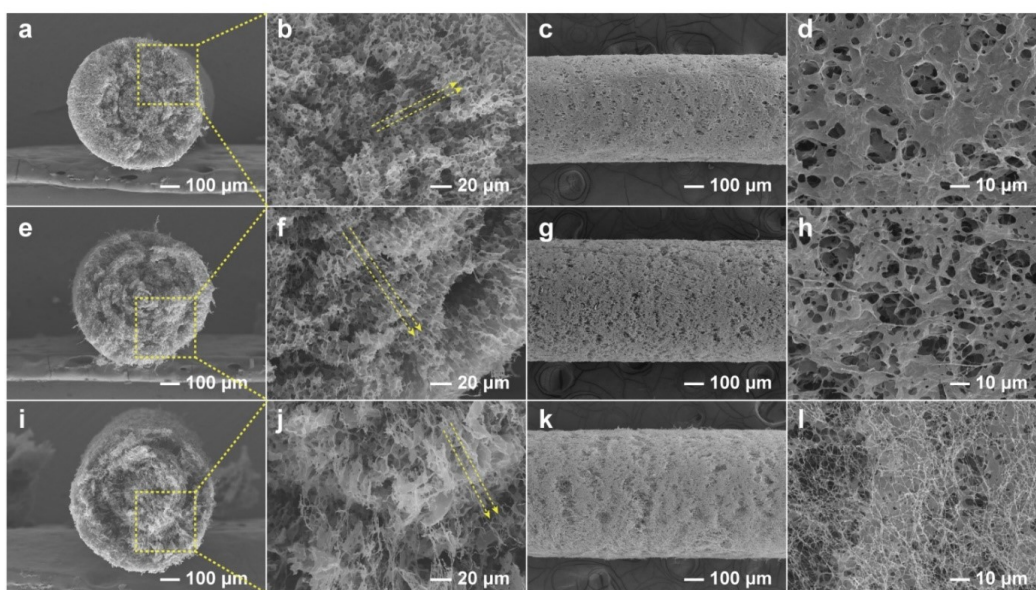

**Fig. S3.** SEM images of cross-sectional and surface structures of (a-d) D-MGP<sub>1</sub>, (e-h) D-MGP<sub>2</sub>, and (i-l) D-MGP<sub>4</sub> fibers.

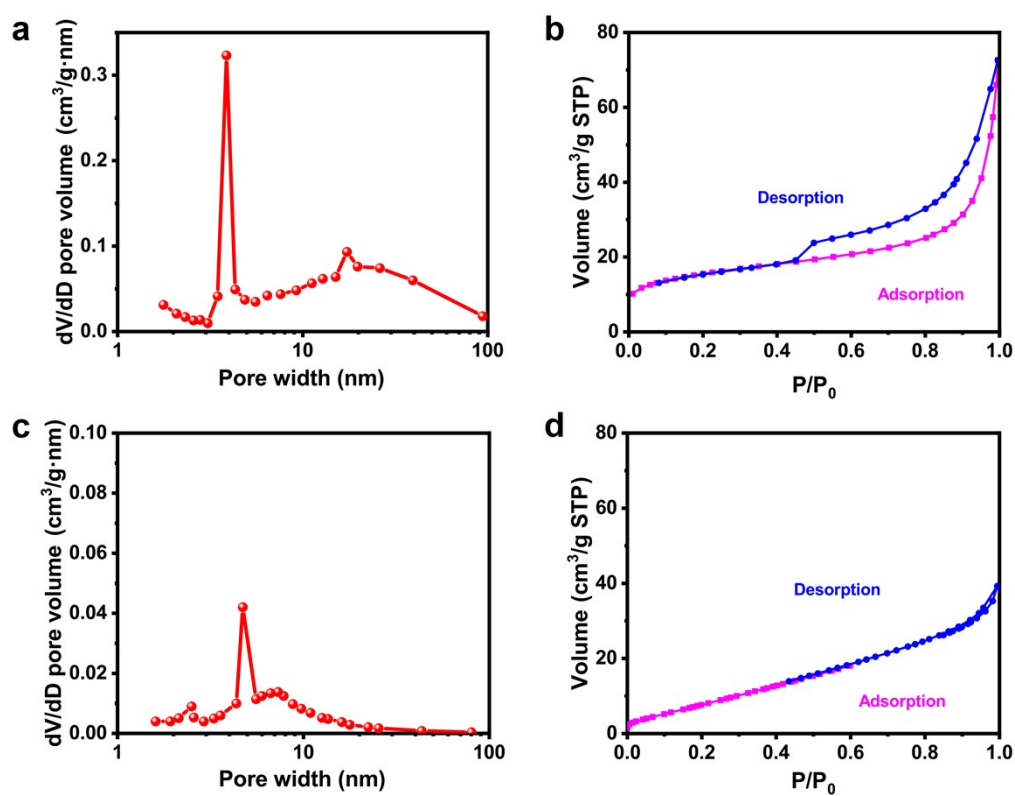

**Fig. S4.** Pore size distributions and the typical nitrogen adsorption and desorption isotherms of (a, b) D-MGP<sub>3</sub> and (c, d) U-MGP<sub>3</sub>.

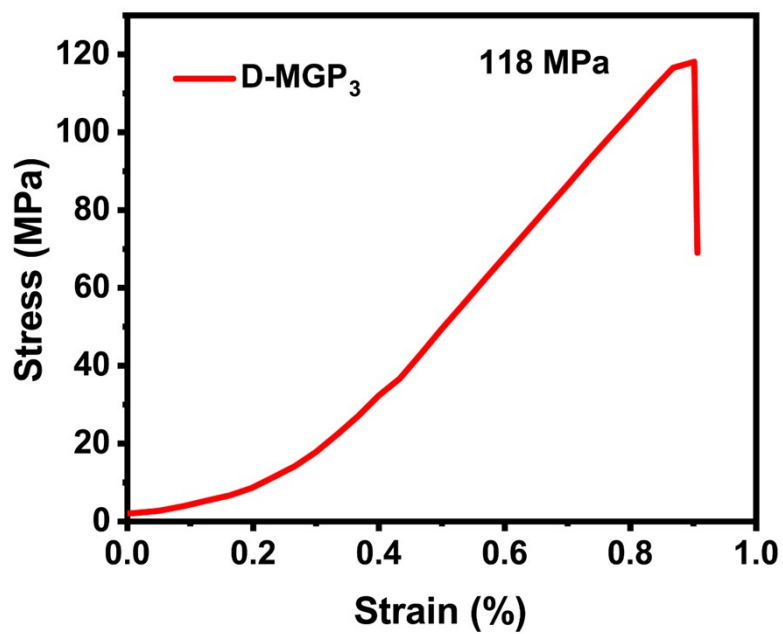

Fig. S5. Stress-strain curve of D-MGP<sub>3</sub>.

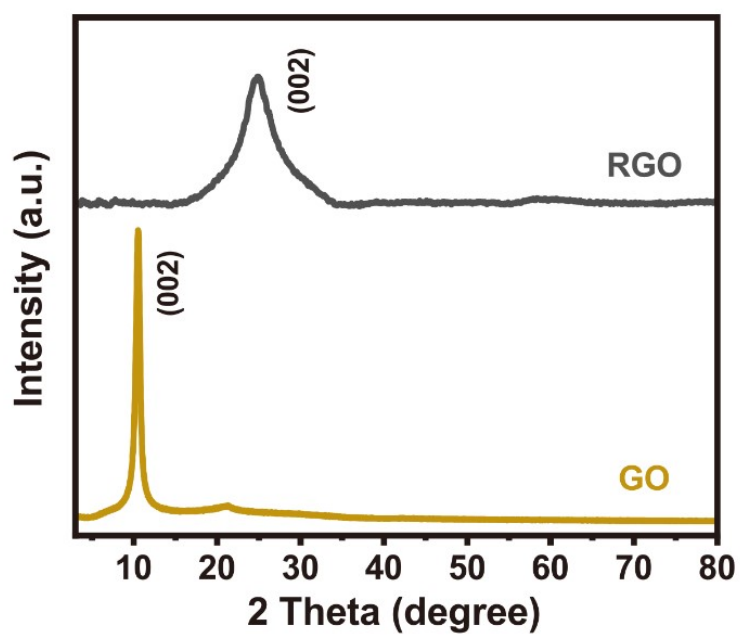

Fig. S6. XRD spectra of RGO and GO.

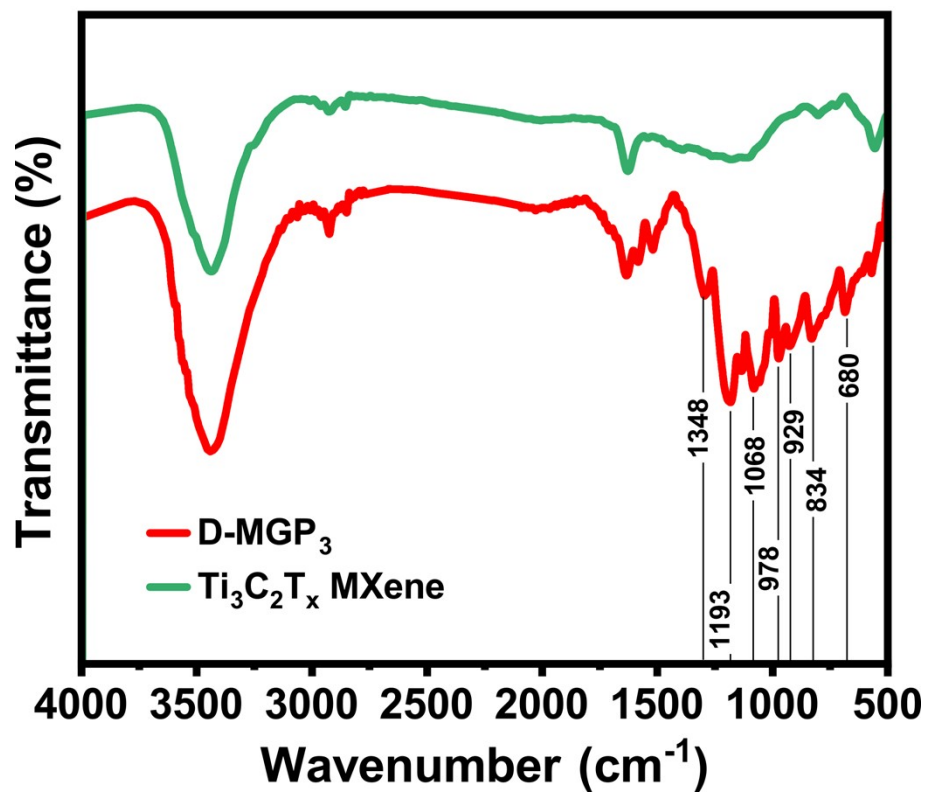

Fig. S7. FT-IR spectra of D-MGP<sub>3</sub> and MXene.

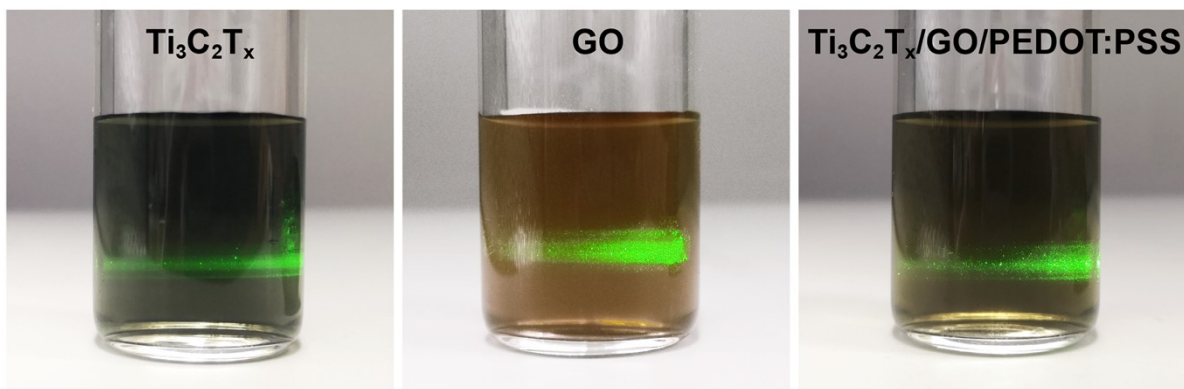

Fig. S8. Tyndall effects of Ti<sub>3</sub>C<sub>2</sub>T<sub>x</sub>, GO, and Ti<sub>3</sub>C<sub>2</sub>T<sub>x</sub>/GO/PEDOT:PSS suspensions.



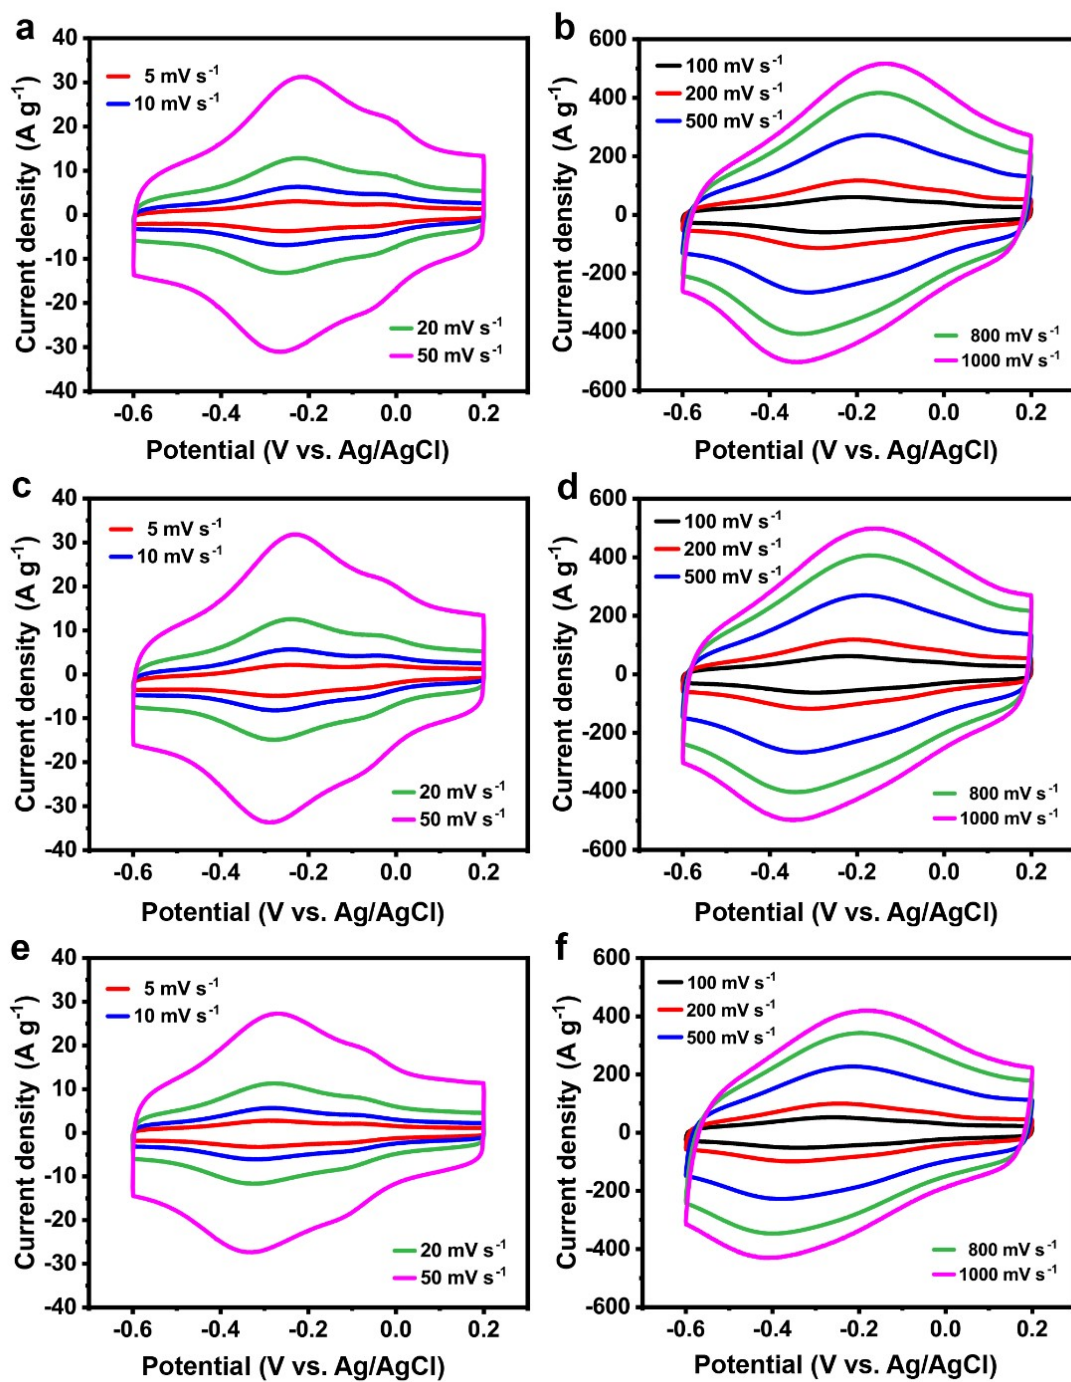

Fig. S9. CV curves of (a, b) D-MGP<sub>1</sub>, (c, d) D-MGP<sub>2</sub>, and (e, f) D-MGP<sub>4</sub> fibers.

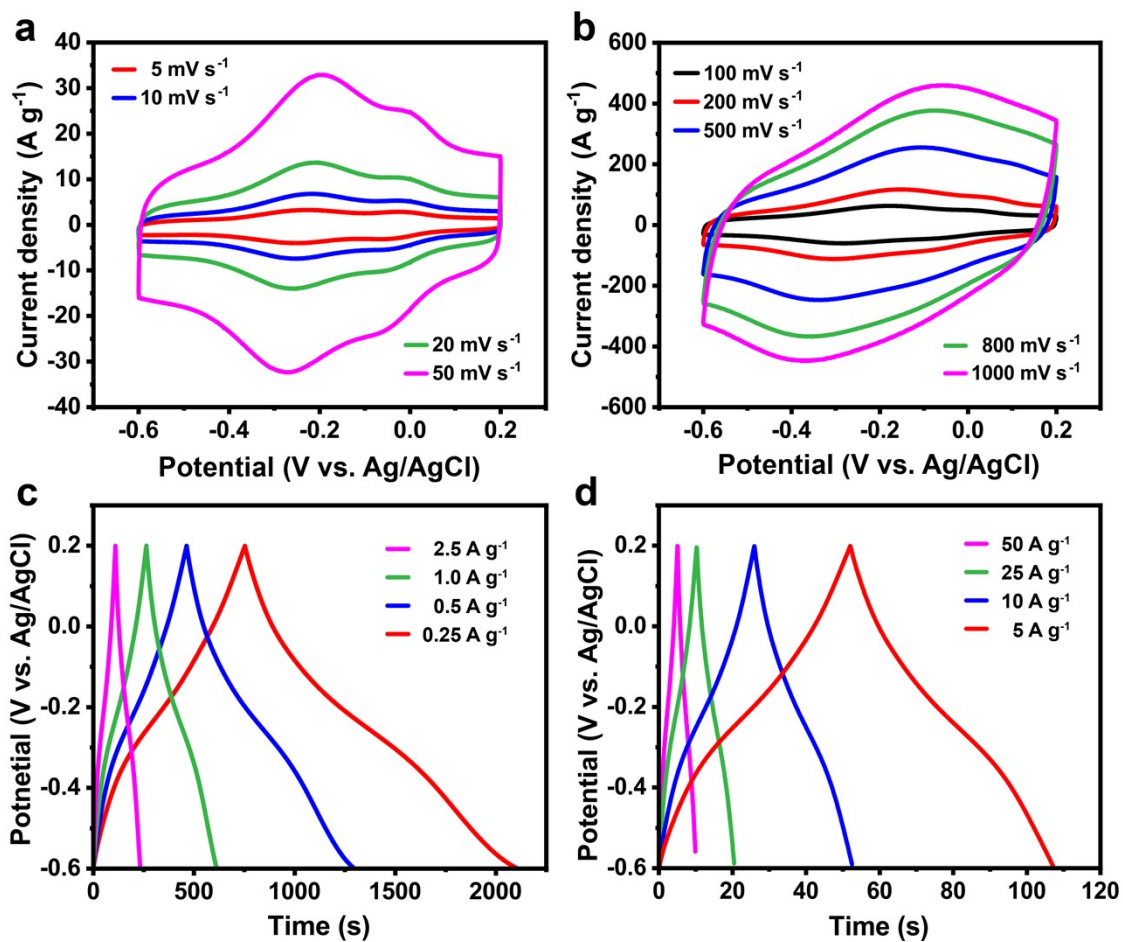

**Fig. S10.** (a, b) CV curves of U-MGP<sub>3</sub> at different scan rates; (c, d) GCD curves of U-MGP<sub>3</sub> at 0.25–50 A g<sup>-1</sup>.

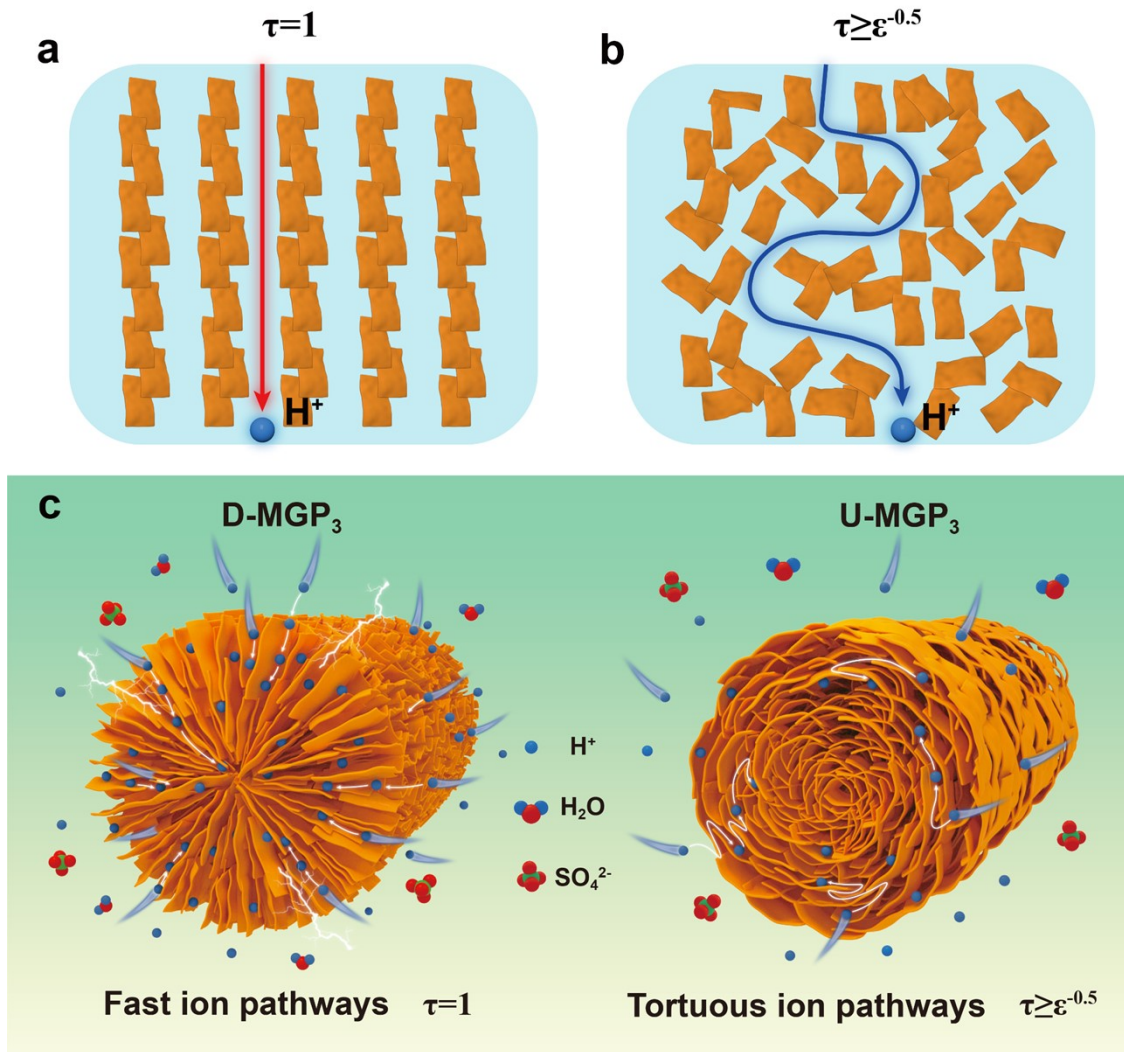

**Fig. S11.** Tortuosity is closely related to the size, shape, and arrangement of nanostructure in electrodes. Structures with (a) vertically aligned nanosheets and (b) randomly distributed isotropic nanosheets. (c) Schematic diagram of the ion transport pathways in D-MGP<sub>3</sub> and U-MGP<sub>3</sub>.



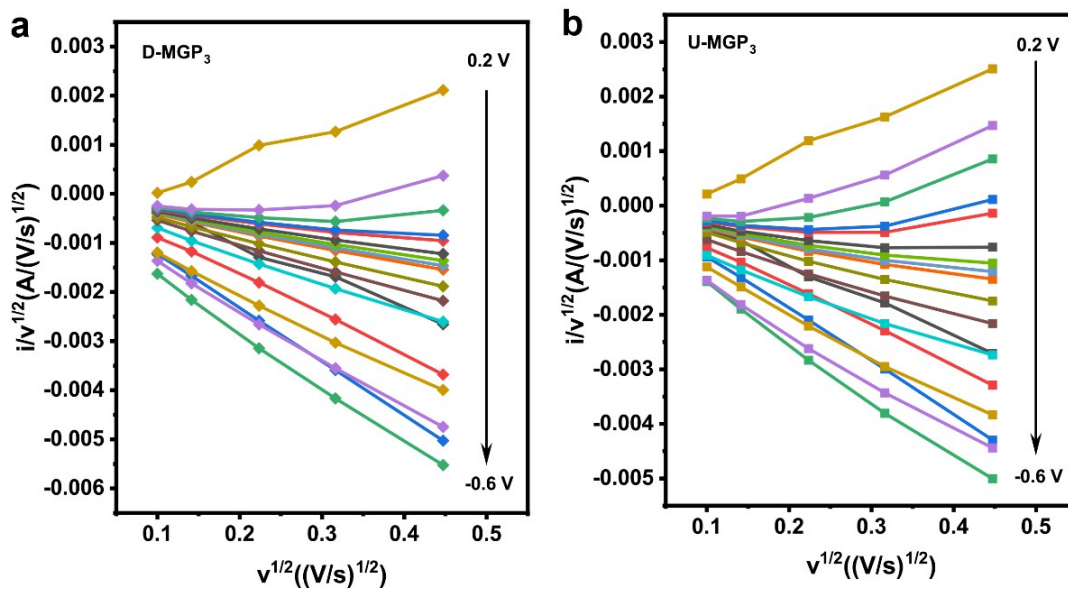

**Fig. S12.** Plots of  $v^{1/2}$  vs.  $i/v^{1/2}$  used for calculating constants  $k_1$  and  $k_2$  at different potentials of -0.6~0.2 V for (a) D-MGP<sub>3</sub>, and (b) U-MGP<sub>3</sub> fiber electrodes.

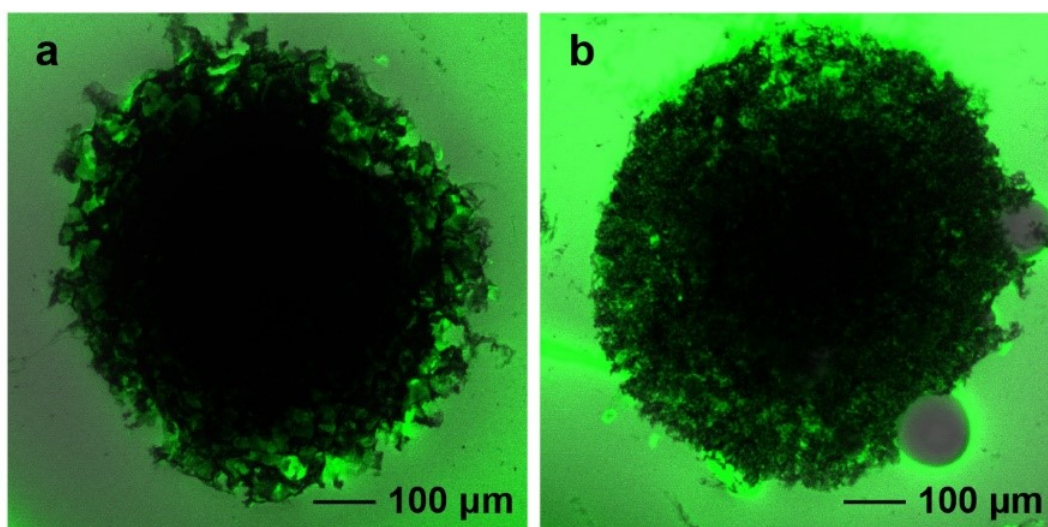

**Fig. S13.** Fluorescent images of the cross-sections of (a) U-MGP<sub>3</sub> and (b) D-MGP<sub>3</sub> fiber electrodes soaked in the electrolyte.

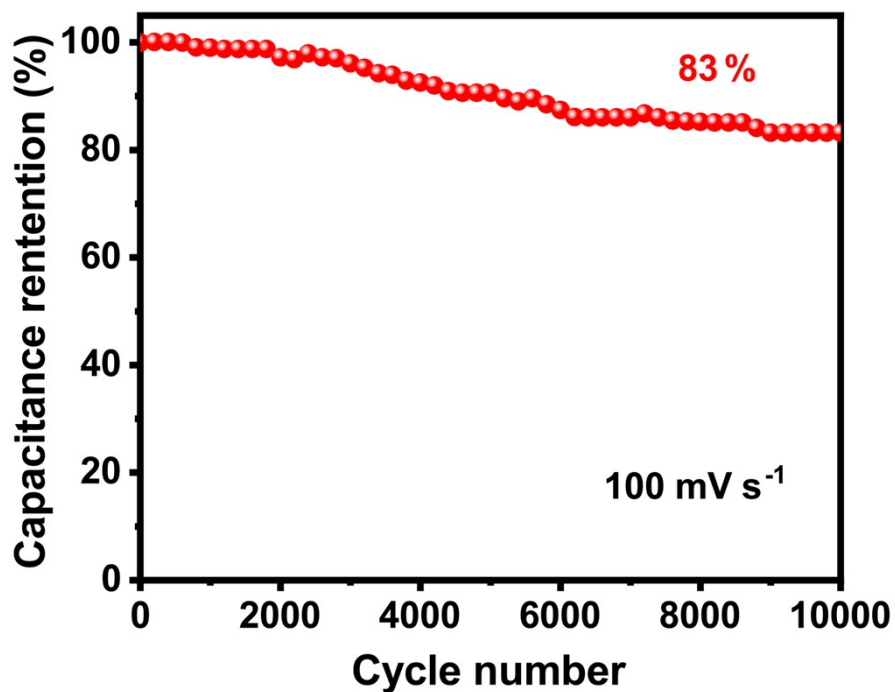

**Fig. S14.** Cycling stability of the fiber supercapacitor under the voltages of 0-0.8 V at a scan rate of 100 mV s<sup>-1</sup> after 10000 cycles.

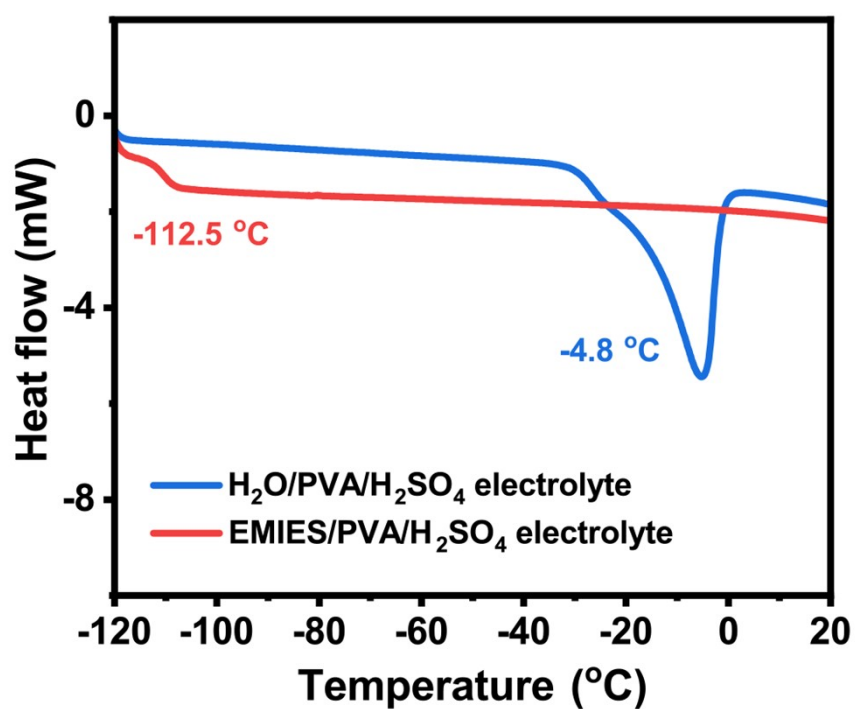

**Fig. S15.** DSC curves of the H<sub>2</sub>O/PVA/H<sub>2</sub>SO<sub>4</sub> electrolyte, and the EMIES/PVA/H<sub>2</sub>SO<sub>4</sub> anti-freezing electrolyte.

**Table S1.** The simulated  $R_s$  and  $R_{ct}$  values of the hybrid fibers.

| Samples            | $R_s$ ( $\Omega$ ) | $R_{ct}$ ( $\Omega$ ) |
|--------------------|--------------------|-----------------------|
| D-MGP <sub>1</sub> | 1.315              | 0.761                 |
| D-MGP <sub>2</sub> | 1.091              | 0.545                 |
| D-MGP <sub>3</sub> | 0.579              | 0.284                 |
| D-MGP <sub>4</sub> | 1.763              | 0.579                 |
| U-MGP <sub>3</sub> | 1.021              | 0.718                 |

**Table S2.** Comparison of electrochemical performances of the D-MGP<sub>3</sub> with those of other MXene-based electrodes reported.

| Samples                                                             | Electrolytes                           | Electrochemical Performances                      | Rate Performances                                                                           | Refs.            |
|---------------------------------------------------------------------|----------------------------------------|---------------------------------------------------|---------------------------------------------------------------------------------------------|------------------|
| Ti <sub>3</sub> C <sub>2</sub> T <sub>x</sub>                       | 3 M H <sub>2</sub> SO <sub>4</sub>     | 380 F g <sup>-1</sup> @ 2 mV s <sup>-1</sup>      | 210 F g <sup>-1</sup> @ 2000 mV s <sup>-1</sup>                                             | 1                |
| Ti <sub>3</sub> C <sub>2</sub> T <sub>x</sub> with alkali treatment | 1 M H <sub>2</sub> SO <sub>4</sub>     | 314 F g <sup>-1</sup> @ 2 mV s <sup>-1</sup>      | 254 F g <sup>-1</sup> @ 1 A g <sup>-1</sup><br>175 F g <sup>-1</sup> @ 10 A g <sup>-1</sup> | 2                |
| d-Ti <sub>3</sub> C <sub>2</sub> T <sub>x</sub> /glycine            | 3 M H <sub>2</sub> SO <sub>4</sub>     | 324 F g <sup>-1</sup> @ 10 mV s <sup>-1</sup>     | 150 F g <sup>-1</sup> @ 1000 mV s <sup>-1</sup>                                             | 3                |
| Few-layer Ti <sub>3</sub> C <sub>2</sub> T <sub>x</sub> MXene       | 1 M H <sub>2</sub> SO <sub>4</sub>     | 255 F g <sup>-1</sup> @ 2 mV s <sup>-1</sup>      | 150 F g <sup>-1</sup> @ 200 mV s <sup>-1</sup>                                              | 4                |
| MXene/CNT yarn                                                      | 3 M H <sub>2</sub> SO <sub>4</sub>     | 523 F g <sup>-1</sup> @ 2 mA cm <sup>-2</sup>     | 283 F g <sup>-1</sup> @ 20 mA cm <sup>-2</sup>                                              | 5                |
| Ti <sub>3</sub> C <sub>2</sub> T <sub>x</sub> /PPy                  | 1 M H <sub>2</sub> SO <sub>4</sub>     | 416 F g <sup>-1</sup> @ 5 mV s <sup>-1</sup>      | 270 F g <sup>-1</sup> @ 100 mV s <sup>-1</sup>                                              | 6                |
| Lignosulfonate /MXene/rGO                                           | 3 M H <sub>2</sub> SO <sub>4</sub>     | 386 F g <sup>-1</sup> @ 2 mV s <sup>-1</sup>      | 241 F g <sup>-1</sup> @ 100 mV s <sup>-1</sup>                                              | 7                |
| Ti <sub>3</sub> C <sub>2</sub> T <sub>x</sub> /rGO fiber            | 1 M H <sub>2</sub> SO <sub>4</sub>     | 195 F g <sup>-1</sup> @ 0.1 A g <sup>-1</sup>     | 195 F g <sup>-1</sup> @ 0.1 A g <sup>-1</sup><br>51 F g <sup>-1</sup> @ 5 A g <sup>-1</sup> | 8                |
| Ti <sub>3</sub> C <sub>2</sub> T <sub>x</sub> /PEDOT:PS S fiber     | 1 M H <sub>2</sub> SO <sub>4</sub>     | 258 F g <sup>-1</sup> @ 5 mV s <sup>-1</sup>      | 158 F g <sup>-1</sup> @ 1000 mV s <sup>-1</sup>                                             | 9                |
| Ti <sub>3</sub> C <sub>2</sub> T <sub>x</sub> fiber                 | 1 M H <sub>2</sub> SO <sub>4</sub>     | 434 F g <sup>-1</sup> @ 5 mV s <sup>-1</sup>      | 203 F g <sup>-1</sup> @ 100 mV s <sup>-1</sup>                                              | 10               |
| Ti <sub>3</sub> C <sub>2</sub> T <sub>x</sub> /rGO                  | 3 M H <sub>2</sub> SO <sub>4</sub>     | 300 F g <sup>-1</sup> @ mV s <sup>-1</sup>        | 250 F g <sup>-1</sup> @ 1000 mV s <sup>-1</sup>                                             | 11               |
| Ti <sub>3</sub> C <sub>2</sub> T <sub>x</sub>                       | 3 M H <sub>2</sub> SO <sub>4</sub>     | 324 F g <sup>-1</sup> @ 5 mV s <sup>-1</sup>      | 270 F g <sup>-1</sup> @ 1000 mV s <sup>-1</sup>                                             | 12               |
| <b>D-MGP<sub>3</sub></b>                                            | <b>3 M H<sub>2</sub>SO<sub>4</sub></b> | <b>475 F g<sup>-1</sup> @ 5 mV s<sup>-1</sup></b> | <b>366 F g<sup>-1</sup> @ 1000 mV s<sup>-1</sup></b>                                        | <b>this work</b> |

## References:

- [1] M. R. Lukatskaya, S. Kota, Z. Lin, M.-Q. Zhao, N. Shpigel, M. D. Levi, J. Halim, P.-L. Taberna, M. W. Barsoum, P. Simon and Y. Gogotsi, *Nat. Energy*, 2017, **2**, 17105.
- [2] T. Li, L. Yao, Q. Liu, J. Gu, R. Luo, J. Li, X. Yan, W. Wang, P. Liu, B. Chen, W. Zhang, W. Abbas, R. Naz and D. Zhang, *Angew. Chem., Int. Ed.*, 2018, **57**, 6115-6119.
- [3] C. Chen, M. Boota, P. Urbankowski, B. Anasori, L. Miao, J. Jiang and Y. Gogotsi, *J. Mater. Chem. A*, 2018, **6**, 4617-4622.
- [4] X. Wang, L. Dong, W. Liu, Y. Huang, X. Pu, J. Wang, F. Kang, J. Li and C. Xu, *J. Energy Chem.*, 2020, **48**, 233-240.
- [5] Z. Wang, S. Qin, S. Seyedin, J. Zhang, J. Wang, A. Levitt, N. Li, C. Haines, R. Ovalle-Robles, W. Lei, Y. Gogotsi, R. H. Baughman and J. M. Razal, *Small*, 2018, **14**, 1802225.
- [6] M. Boota, B. Anasori, C. Voigt, M. Q. Zhao, M. W. Barsoum and Y. Gogotsi, *Adv. Mater.*, 2016, **28**, 1517-1522.
- [7] L. Ma, T. Zhao, F. Xu, T. You and X. Zhang, *Chem. Eng. J.*, 2021, **405**, 126694.
- [8] Z. Wang, Y. Chen, M. Yao, J. Dong, Q. Zhang, L. Zhang and X. Zhao, *J. Power Sources*, 2020, **448**, 227398.
- [9] J. Zhang, S. Seyedin, S. Qin, Z. Wang, S. Moradi, F. Yang, P. A. Lynch, W. Yang, J. Liu, X. Wang and J. M. Razal, *Small*, 2019, **15**, 1804732.
- [10] J. Zhang, S. Uzun, S. Seyedin, P. A. Lynch, B. Akuzum, Z. Wang, S. Qin, M. Alhabeab, C. E. Shuck, W. Lei, E. C. Kumbur, W. Yang, X. Wang, G. Dion, J. M. Razal and Y. Gogotsi, *ACS Cent. Sci.*, 2020, **6**, 254-265.

[11]Z. Wu, X. Liu, T. Shang, Y. Deng, N. Wang, X. Dong, J. Zhao, D. Chen, Y. Tao and Q.

H. Yang, *Adv. Funct. Mater.*, 2021, **31**, 2102874.

[12]J. Tang, T. Mathis, X. Zhong, X. Xiao, H. Wang, M. Anayee, F. Pan, B. Xu and Y.

Gogotsi, *Adv. Energy Mater.*, 2020, **11**, 2003025.
